# Supplementary material for: Multiple Genetic Interaction Experiments Provide Complementary Information Useful for Gene Function Prediction
Source: PubMed Central journal article supplement (PMC3380825; doi:10.1371/journal.pcbi.1002559), 2012-06-21
Supplement: pcbi.1002559.s009.pdf [file pcbi.1002559.s009.pdf]

## Supplementary material

# Multiple genetic interaction experiments provide complementary information useful for gene function prediction

Magali Michaut and Gary D. Bader

|                                                                            |           |
|----------------------------------------------------------------------------|-----------|
| <b>GENETIC INTERACTION NETWORKS .....</b>                                  | <b>2</b>  |
| DATA SETS.....                                                             | 2         |
| DEFINITION OF THE COMMON SPACE .....                                       | 2         |
| FILTERING INTERACTIONS .....                                               | 2         |
| <b>COMPARISON MEASURES DEFINITION .....</b>                                | <b>2</b>  |
| OVERLAP AND AGREEMENT BETWEEN DATA SETS.....                               | 2         |
| STATISTICAL MODEL .....                                                    | 3         |
| <b>COMPARISON MEASURES RESULTS.....</b>                                    | <b>6</b>  |
| ALL TESTED GENE PAIRS .....                                                | 6         |
| TRIPLETS OF GENE PAIRS TESTED ACROSS REFERENCE, CONTROL AND CONDITION..... | 6         |
| <b>GENE FUNCTION PREDICTION PERFORMANCE.....</b>                           | <b>8</b>  |
| ALL TESTED GENE PAIRS .....                                                | 8         |
| TRIPLETS OF GENE PAIRS TESTED ACROSS REFERENCE, CONTROL AND CONDITION..... | 13        |
| <b>SOFTWARE .....</b>                                                      | <b>17</b> |
| <b>REFERENCES .....</b>                                                    | <b>17</b> |

## Genetic interaction networks

### Data sets

All genetic interaction data sets were downloaded from original publications or requested from the authors. When comparing two data sets, we only consider gene pairs tested in both. All networks were considered as undirected (query and array genes where reported have the same role in our analysis).

| Network               | Name | Genes | Positive interactions | Negative interactions | Positive cutoff | Negative cutoff |
|-----------------------|------|-------|-----------------------|-----------------------|-----------------|-----------------|
| Costanzo [1]          | COS  | 4417  | 56138                 | 101256                | 0.08            | -0.08           |
| Collins [2]           | COL  | 743   | 5690                  | 11482                 | 1.9             | -2.5            |
| Schuldiner [3]        | SCH  | 424   | 1278                  | 3679                  | 2.0             | -2.0            |
| Bandyopadhyay-un [4]  | B-U  | 419   | 957                   | 2027                  | 1.5             | -2.0            |
| Bandyopadhyay-mms [4] | B-M  | 419   | 864                   | 2069                  | 1.8             | -2.2            |
| Burston [5]           | BUR  | 359   | 711                   | 1103                  | 5463            | -4681           |
| Jonikas [6]           | JON  | 330   | 1196                  | 1911                  | 0.81            | -0.38           |

Table S1. Description of the genetic interaction data sets

### Definition of the common space

In order to perform a meaningful comparison between given data sets, we consider only gene pairs that were tested in all of them. We filter out genes that were not present in both studies.

### Filtering interactions

The SGA data set is defined as the intermediate data set in Costanzo et al. ( $\epsilon > 0.08$  and  $p < 0.05$ ). We define the cutoffs for other data sets so that the numbers of positive and negative observed interactions are the same as for SGA.

|     | COS     | COL    | SCH   | B-U   | B-M   | BUR   | JON   |
|-----|---------|--------|-------|-------|-------|-------|-------|
| COS | 5276435 | 101908 | 37255 | 40331 | 40331 | 10100 | 17038 |
| COL | 101908  | 183125 | 398   | 4916  | 4916  | 548   | 1558  |
| SCH | 37255   | 398    | 89676 | 43    | 43    | 781   | 5429  |
| B-U | 40331   | 4916   | 43    | 78841 | 78841 | 212   | 341   |
| B-M | 40331   | 4916   | 43    | 78841 | 78841 | 212   | 341   |
| BUR | 10100   | 548    | 781   | 212   | 212   | 20795 | 334   |
| JON | 17038   | 1558   | 5429  | 341   | 341   | 334   | 34634 |

Table S2. Number of pairs tested in both data sets.

## Comparison measures definition

### Overlap and agreement between data sets

When comparing data sets, we only consider gene pairs tested in all sets. For each gene pair, we consider if it was observed as interacting in zero, one or two data sets. When it is observed in both data sets, we then consider the type of interaction (positive/negative) and check if both data sets agree on this type. ‘Overlap’ is the percentage of interactions in common among all observed interactions; ‘unique’ is the percentage of interactions

observed in only one network among all observed interactions; ‘disagree’ is the percentage of interactions of different type (positive, negative) among all interactions observed in common.

| P-value Estimate | COS      | COL       | SCH       | B-U       | B-M       | BUR       | JON      |
|------------------|----------|-----------|-----------|-----------|-----------|-----------|----------|
| COS              |          | 0         | 0         | 1.40E-125 | 2.80E-72  | 1.60E-09  | 3.40E-09 |
| COL              | 2.20E-01 |           | 2.90E-98  | 1.20E-193 | 1.20E-82  | 1.30E-01  | 6.40E-05 |
| SCH              | 1.40E-01 | 6.50E-01  |           | 8.00E-02  | 1.60E-01  | 4.60E-01  | 1.10E-06 |
| B-U              | 8.40E-02 | 2.90E-01  | 1.90E-01  |           | 0         | 8.20E-01  | 8.90E-01 |
| B-M              | 6.30E-02 | 1.90E-01  | 1.50E-01  | 5.80E-01  |           | 1.20E-01  | 2.80E-02 |
| BUR              | 4.20E-02 | -4.50E-02 | 1.90E-02  | -1.10E-02 | -7.50E-02 |           | 7.30E-03 |
| JON              | 3.20E-02 | -7.20E-02 | -4.70E-02 | -5.20E-03 | -8.40E-02 | -1.00E-01 |          |

Table S3. Correlation matrix (lower part is Spearman estimate and upper part is p-value).

|     |       |       |       |       |       |       |     |
|-----|-------|-------|-------|-------|-------|-------|-----|
| COS |       |       |       |       |       |       |     |
| COL | 0.218 |       |       |       |       |       |     |
| SCH | 0.229 | 0.487 |       |       |       |       |     |
| B-U | 0.122 | 0.274 | 0.333 |       |       |       |     |
| B-M | 0.091 | 0.224 | 0.2   | 0.327 |       |       |     |
| BUR | 0.074 | 0.127 | 0.05  | 0.069 | 0.031 |       |     |
| JON | 0.127 | 0.166 | 0.189 | 0.182 | 0.145 | 0.034 |     |
|     | COS   | COL   | SCH   | B-U   | B-M   | BUR   | JON |

Table S4. Overlap matrix.

|     |      |      |      |      |      |      |     |
|-----|------|------|------|------|------|------|-----|
| COS |      |      |      |      |      |      |     |
| COL | 0.78 |      |      |      |      |      |     |
| SCH | 0.77 | 0.51 |      |      |      |      |     |
| B-U | 0.88 | 0.73 | 0.67 |      |      |      |     |
| B-M | 0.91 | 0.78 | 0.8  | 0.67 |      |      |     |
| BUR | 0.93 | 0.87 | 0.95 | 0.93 | 0.97 |      |     |
| JON | 0.87 | 0.83 | 0.81 | 0.82 | 0.85 | 0.97 |     |
|     | COS  | COL  | SCH  | B-U  | B-M  | BUR  | JON |

Table S5. Unique matrix.

|     |      |      |      |      |      |     |     |
|-----|------|------|------|------|------|-----|-----|
| COS |      |      |      |      |      |     |     |
| COL | 0.05 |      |      |      |      |     |     |
| SCH | 0.06 | 0.02 |      |      |      |     |     |
| B-U | 0.06 | 0.05 | 1    |      |      |     |     |
| B-M | 0.08 | 0.11 | 1    | 0.01 |      |     |     |
| BUR | 0.31 | 0.62 | 0.50 | 1    | 1    |     |     |
| JON | 0.53 | 0.72 | 0.57 | 0.75 | 0.78 | 0   |     |
|     | COS  | COL  | SCH  | B-U  | B-M  | BUR | JON |

Table S6. Disagreement matrix.

### Statistical model

#### Definitions and Notations

|                  | Interacting $ I =n$ | Non Interacting $ I_c =m$ |
|------------------|---------------------|---------------------------|
| Edge (=observed) | TP                  | FP                        |

|                         |    |    |
|-------------------------|----|----|
| No edge (=not observed) | FN | TN |
|-------------------------|----|----|

Table S7. Definitions and notations.

True positive (TP) are interacting gene pairs connected by an edge.

False positive (FP) are not interacting gene pairs connected by an edge.

True negative (TN) are not interacting gene pairs not connected by an edge.

False negative (FN) are interacting gene pairs not connected by an edge.

Sensitivity =  $TP / (TP + FN)$  = True positive rate (TPR) = Recall

Precision =  $TP / (TP + FP)$  = True discovery rate (TDR)

Probability of FP (PFP) = FP rate (FPR) =  $FP / (FP + TN)$

Probability of FN (PFN) = FN rate (FNR) =  $FN / (FN + TP)$

### Error rate estimation

Based on symmetrical interactions and known functional relationships, Costanzo et al. assessed the error rates in the SGA data set for positive and negative interactions (Table S8).

| Network                      | Number interactions | Sensitivity | Precision |
|------------------------------|---------------------|-------------|-----------|
| $\epsilon > 0.08, p < 0.05$  | 59,887              | 0.18        | 0.59      |
| $\epsilon < -0.08, p < 0.05$ | 108,417             | 0.35        | 0.63      |

Table S8. Sensitivity and precision of SGA genetic interactions scores [1].

The probability to have FN (or false negative rate) is directly given by the sensitivity  
 $PFN = 1 - sensitivity$

Nevertheless, the probability to have FP is not directly given by the precision. Given the number of tested and observed interactions in the common space and using these values of sensitivity and precision, we can compute the estimated numbers of TP, TN, FP, FN and finally compute the probabilities to have FP as follows:

The number of gene pairs with an edge is  $observed = TP + FP$

Thus using the definition of the precision, the number of TP is:

$$TP = precision * (TP + FP) = precision * observed$$

We can deduce FP:

$$FP = observed - TP$$

Using the definition of the sensitivity, we compute the number of FN as:

$$FN = TP * (1 - sensitivity) / sensitivity$$

And finally we get TN:

$$TN = tested - (TP + FP + FN)$$

$$PFP = FP / (FP + TN)$$

Unfortunately, we don't know the error rates for other data sets. Consequently, we used the values from the SGA data set as an estimate of these rates. We define the cutoff so that the numbers of observed interactions match between the two data sets (if both data sets are sampled from the same model and with the same error rates, we expect the same numbers of interactions on the common space).

Expected counts

Using the notations of Chiang et al. [7], we define gene pairs as being interacting (I) or not interacting (Ic). Given the values  $n=|I|$  and  $m=|Ic|$ , we can define the expected values of three random variables: the number of gene pairs where no edge exists in any data set ( $X_0$ ), the number of gene pairs where an edge exists for exactly one data sets (and not the other)( $X_1$ ), the number of gene pairs where an edge exists in both data sets ( $X_2$ ).

$$E[X_0] = n * P_{FN}^A * P_{FN}^B + m * (1 - P_{FP}^A)(1 - P_{FP}^B) \quad (1)$$

$$E[X_1] = n * ((1 - P_{FN}^A) * P_{FN}^B + (1 - P_{FN}^B) * P_{FN}^A) + m * (P_{FP}^A * (1 - P_{FP}^B) + P_{FP}^B * (1 - P_{FP}^A)) \quad (2)$$

$$E[x_2] = n * (1 - P_{FN}^A)(1 - P_{FN}^B) + m * P_{FP}^A * P_{FP}^B \quad (3)$$

The total number of gene pairs considered is  $N = n+m$ .

Comparison of observed and expected

We consider here the presence or absence of an interaction between each tested gene pair. The overlap is measured by the Jaccard coefficient (intersection / union).

| Network |      |      | Overlap |       |   |         | Unique |      |   |         |
|---------|------|------|---------|-------|---|---------|--------|------|---|---------|
| Group   | Name | Type | Exp     | Obs   | D | Pval    | Exp    | Obs  | D | Pval    |
| CONT    | COL  | pos  | 0.059   | 0.098 | + | 2.2e-11 | 0.94   | 0.90 | - | 5.6e-05 |
| CONT    | COL  | neg  | 0.130   | 0.260 | + | 1.1e-69 | 0.87   | 0.74 | - | 6.9e-70 |
| CONT    | SCH  | pos  | 0.058   | 0.077 | + | 4.0e-02 | 0.94   | 0.92 | - | 1.7e-01 |
| CONT    | SCH  | neg  | 0.128   | 0.278 | + | 1.2e-26 | 0.87   | 0.72 | - | 2.0e-27 |
| CONT    | B-U  | pos  | 0.058   | 0.060 | + | 4.6e-01 | 0.94   | 0.94 | - | 4.6e-01 |
| CONT    | B-U  | neg  | 0.126   | 0.143 | + | 1.3e-01 | 0.87   | 0.86 | - | 1.8e-01 |
| MMS     | B-M  | pos  | 0.058   | 0.039 | - | 4.9e-02 | 0.94   | 0.96 | + | 2.3e-01 |
| MMS     | B-M  | neg  | 0.126   | 0.106 | - | 6.0e-02 | 0.87   | 0.89 | + | 1.2e-01 |
| PHENO   | BUR  | pos  | 0.059   | 0.035 | - | 3.9e-02 | 0.94   | 0.96 | + | 2.0e-01 |
| PHENO   | BUR  | neg  | 0.130   | 0.058 | - | 8.7e-07 | 0.87   | 0.94 | + | 9.5e-04 |
| PHENO   | JON  | pos  | 0.060   | 0.032 | - | 1.4e-03 | 0.94   | 0.97 | + | 9.5e-02 |
| PHENO   | JON  | neg  | 0.130   | 0.070 | - | 3.0e-07 | 0.87   | 0.93 | + | 3.7e-04 |

Table S9. Comparison of expected and observed measures between the reference SGA network and other networks separated by type (positive/negative interactions). The column D indicates if the observed overlap/unique measure is more (+) or less (-) than

expected. P-values are computed using a Fisher's exact test between expected and observed counts.

## Comparison measures results

### All tested gene pairs

For two given network groups, we test the difference of the means of each given measure with a Student's t-Test. When there is a single network in the group (MMS) we assess the significance using a normal distribution with mean and standard deviation estimated from the control distribution, which is assumed to be normally distributed (no rejection of the Shapiro test).

| group1      | group2  | measure     | p-value     |
|-------------|---------|-------------|-------------|
| PHENO / MMS | CONTROL | correlation | 0.055810537 |
| PHENO / MMS | CONTROL | overlap     | 0.047527726 |
| PHENO / MMS | CONTROL | unique      | 0.047527726 |
| PHENO / MMS | CONTROL | disagree    | 0.095747104 |
| PHENO / MMS | CONTROL | pos overlap | 0.022831834 |
| PHENO / MMS | CONTROL | pos unique  | 0.022400195 |
| PHENO / MMS | CONTROL | neg overlap | 0.027792196 |
| PHENO / MMS | CONTROL | neg unique  | 0.027815372 |
| PHENO       | CONTROL | correlation | 0.050406387 |
| PHENO       | CONTROL | overlap     | 0.064920128 |
| PHENO       | CONTROL | unique      | 0.064920128 |
| PHENO       | CONTROL | disagree    | 0.092633679 |
| PHENO       | CONTROL | pos overlap | 0.021599608 |
| PHENO       | CONTROL | pos unique  | 0.020868108 |
| PHENO       | CONTROL | neg overlap | 0.027834032 |
| PHENO       | CONTROL | neg unique  | 0.027880324 |
| MMS         | CONTROL | correlation | 0.103693128 |
| MMS         | CONTROL | overlap     | 0.046250538 |
| MMS         | CONTROL | unique      | 0.046250538 |
| MMS         | CONTROL | disagree    | 5.44E-13    |
| MMS         | CONTROL | pos overlap | 0.015150213 |
| MMS         | CONTROL | pos unique  | 0.016404722 |
| MMS         | CONTROL | neg overlap | 0.047406139 |
| MMS         | CONTROL | neg unique  | 0.048687717 |

Table S10. Indicative statistics on the comparison of different groups of networks regarding the comparison measures computed (correlation, overlap, unique, disagree).

### Triplets of gene pairs tested across reference, control and condition

We consider here only gene pairs that were tested in the reference network and in a PHENO/MMS network and a CONTROL network. There are a total of 48499 of these triplets of gene pairs.

| REF | PHENO/MMS         | CONTROL          | Shared Genes | Shared Tested Interactions |
|-----|-------------------|------------------|--------------|----------------------------|
| SGA | Bandyopadhyay-mms | Collins          | 115          | 3137                       |
| SGA | Bandyopadhyay-mms | Schuldiner       | 9            | 23                         |
| SGA | Bandyopadhyay-mms | Bandyopadhyay-un | 382          | 40331                      |
| SGA | Burston           | Collins          | 65           | 379                        |
| SGA | Burston           | Schuldiner       | 57           | 471                        |
| SGA | Burston           | Bandyopadhyay-un | 35           | 107                        |
| SGA | Jonikas           | Collins          | 69           | 929                        |
| SGA | Jonikas           | Schuldiner       | 104          | 2945                       |
| SGA | Jonikas           | Bandyopadhyay-un | 33           | 177                        |

Table S12. Number of gene pairs that were tested in the SGA reference network, one of the PHENO/MMS networks and one of the CONTROL networks.

We computed the similarity measures on the subset of gene pairs present in a given triplet of networks described in Table S12.

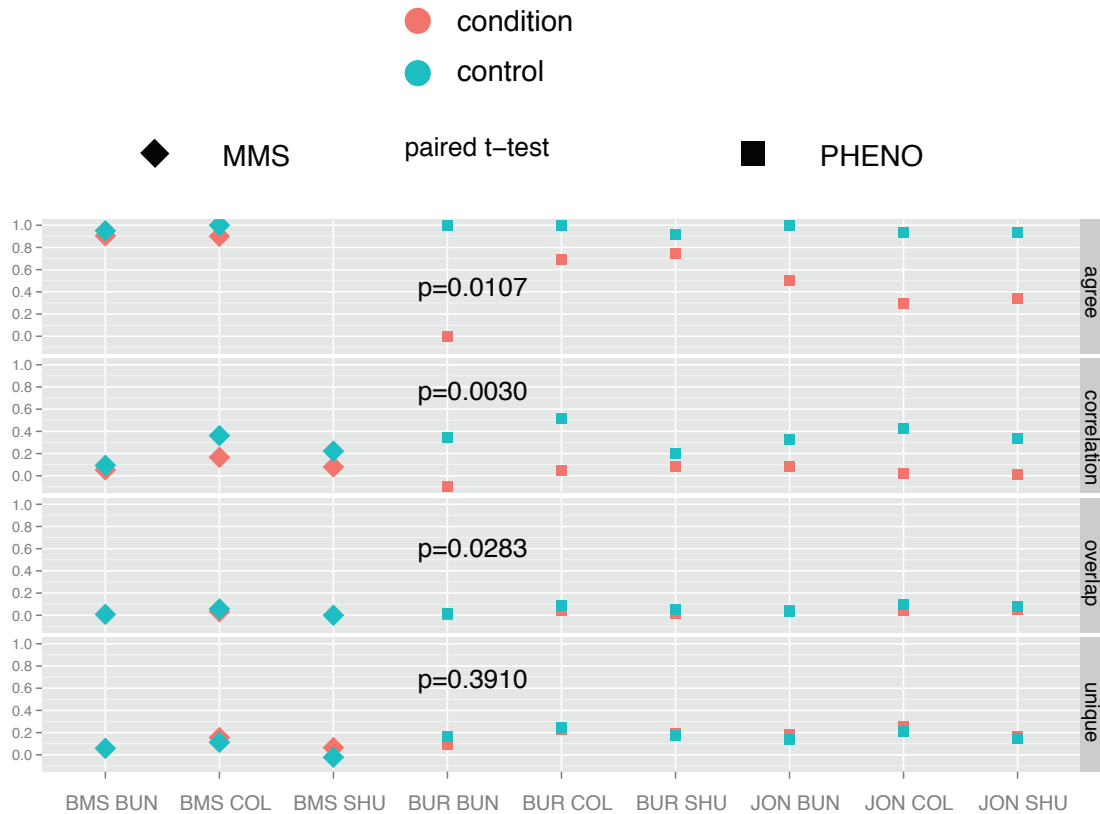

Figure S1. Similarity measures restricted to the sets of gene pairs tested in the reference, a CONTROL and a PHENO/MMS network. For a given measure, the difference between the PHENO/MMS and CONTROL values is tested by a paired t-test. For the specific

case with Bandyopadhyay-MMS as PHENO/MMS and Schuldiner as CONTROL (BMS-SHU), no interactions are observed between the same gene pairs, thus the agreement coefficient is not available.

## Gene function prediction performance

For each network, we only consider GO terms with at least five genes in the networks.

### All tested gene pairs

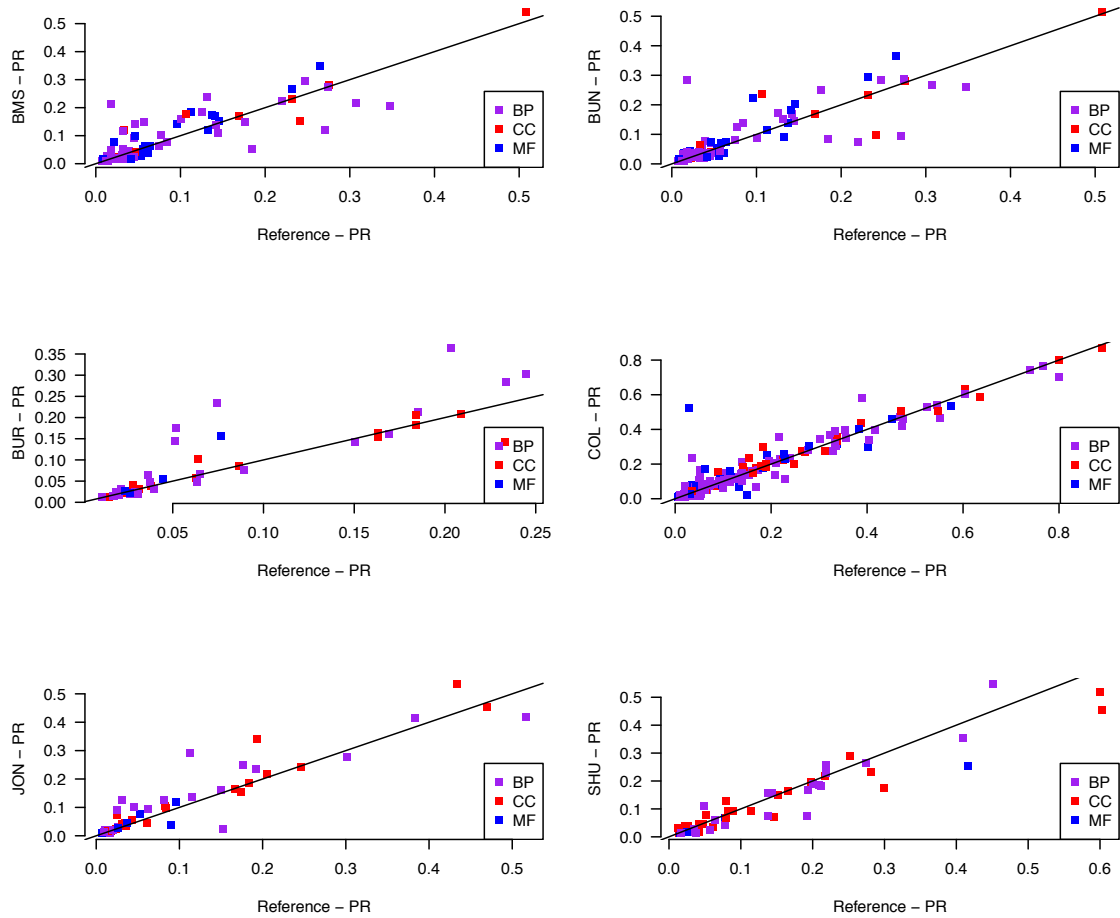

Figure S2. Performance of the combined and reference networks as measured by the area under the PR curve.

| GO identifier | GO Term Name                | Network | Size | Improvement score | Adjusted p-value |
|---------------|-----------------------------|---------|------|-------------------|------------------|
| GO:0045449    | regulation of transcription | BMS     | 7    | 0.19              | 0.004            |



|            |                                                                            |     |    |       |          |
|------------|----------------------------------------------------------------------------|-----|----|-------|----------|
| GO:0000079 | regulation of cyclin-dependent protein kinase activity                     | BUN | 6  | -0.18 | 0.026    |
| GO:0045449 | regulation of transcription                                                | BUN | 7  | 0.26  | 4.93E-05 |
| GO:0007015 | actin filament organization                                                | BUR | 9  | 0.12  | 0.039    |
| GO:0030968 | endoplasmic reticulum unfolded protein response                            | BUR | 5  | 0.16  | 0.003    |
| GO:0032511 | late endosome to vacuole transport via multivesicular body sorting pathway | BUR | 7  | 0.16  | 0.003    |
| GO:0000404 | loop DNA binding                                                           | COL | 5  | 0.49  | 3.81E-17 |
| GO:0006298 | mismatch repair                                                            | COL | 10 | 0.20  | 0.012    |
| GO:0043486 | histone exchange                                                           | COL | 10 | 0.19  | 0.012    |
| GO:0000839 | Hrd1p ubiquitin ligase ERAD-L complex                                      | JON | 5  | 0.15  | 0.039    |
| GO:0006486 | protein glycosylation                                                      | JON | 9  | 0.18  | 0.007    |
| GO:0000839 | Hrd1p ubiquitin ligase ERAD-L complex                                      | SHU | 5  | -0.15 | 0.015    |
| GO:0004579 | dolichyl-diphosphooligosaccharide-protein glycotransferase activity        | SHU | 6  | -0.16 | 0.010    |

Table S11. Improvement of the gene function performance of the combined network as compared to the condition and reference networks alone as measured by the area under the PR curve. The relative improvement of the combined network C obtained from two individual networks A and B is computed as follows:

$$I = \frac{S_c - S_{A,B}}{S_{A,B}}$$

where  $S_{A,B}$  is the mean score of the two individual networks A and B. Significant outliers were identified based on their residuals to the linear fit. P-values were then computed under the assumption that the distribution of the residuals is normal, and were further corrected for multiple testing using the Benjamini-Hochberg method (FDR < 0.05).

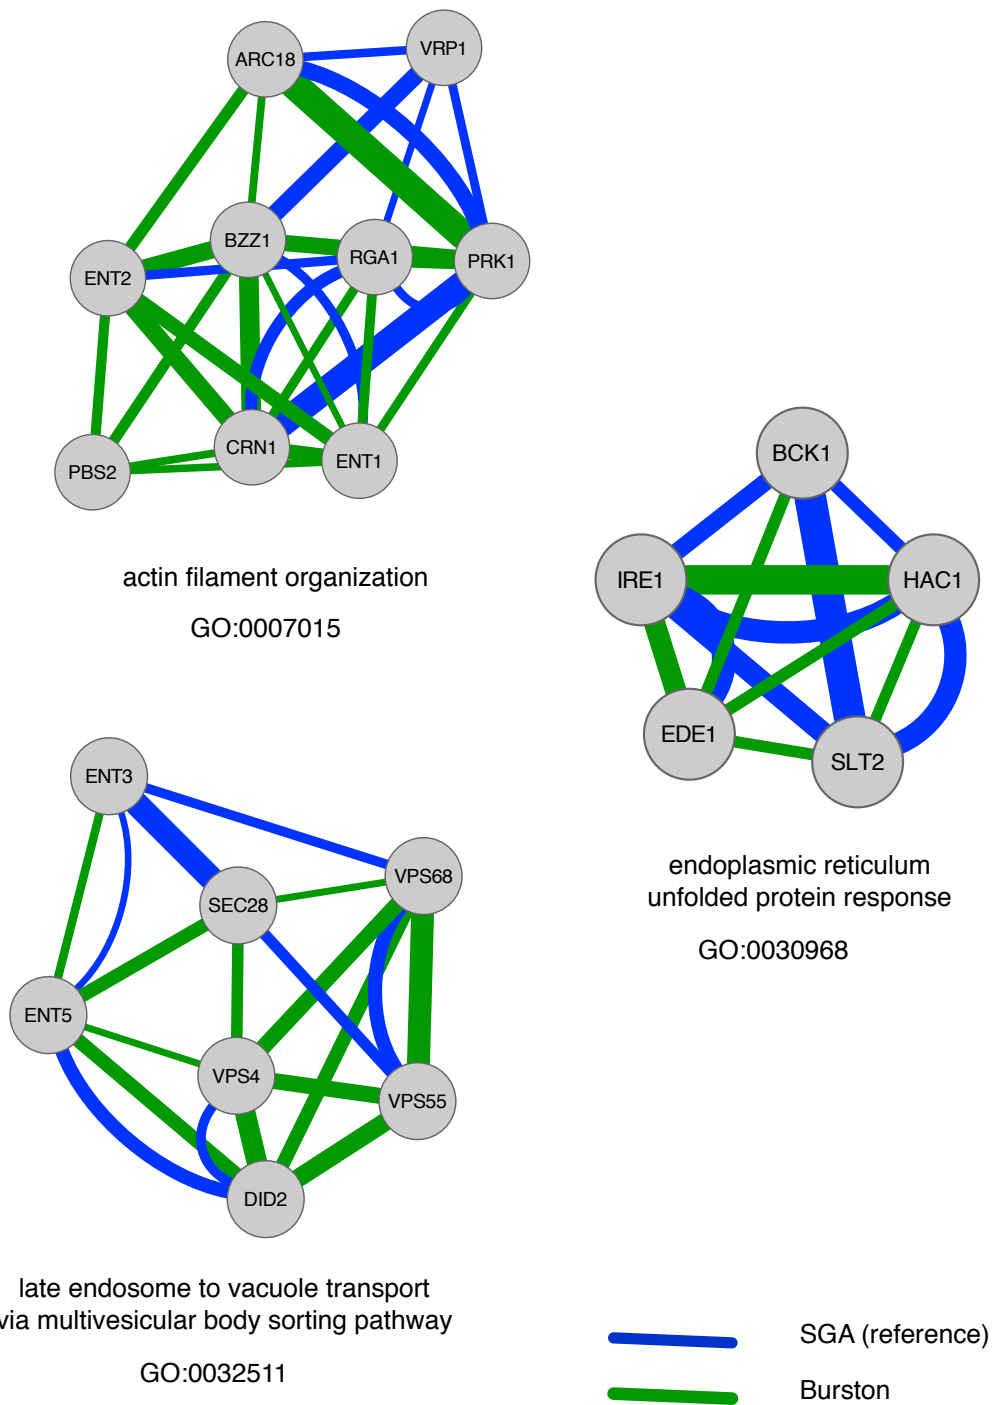

Figure S3. Correlation networks for the SGA and Burston data sets, limited to the gene pairs tested in both. The color of the edges indicates the network. The thicker the edge, the higher the correlation value.

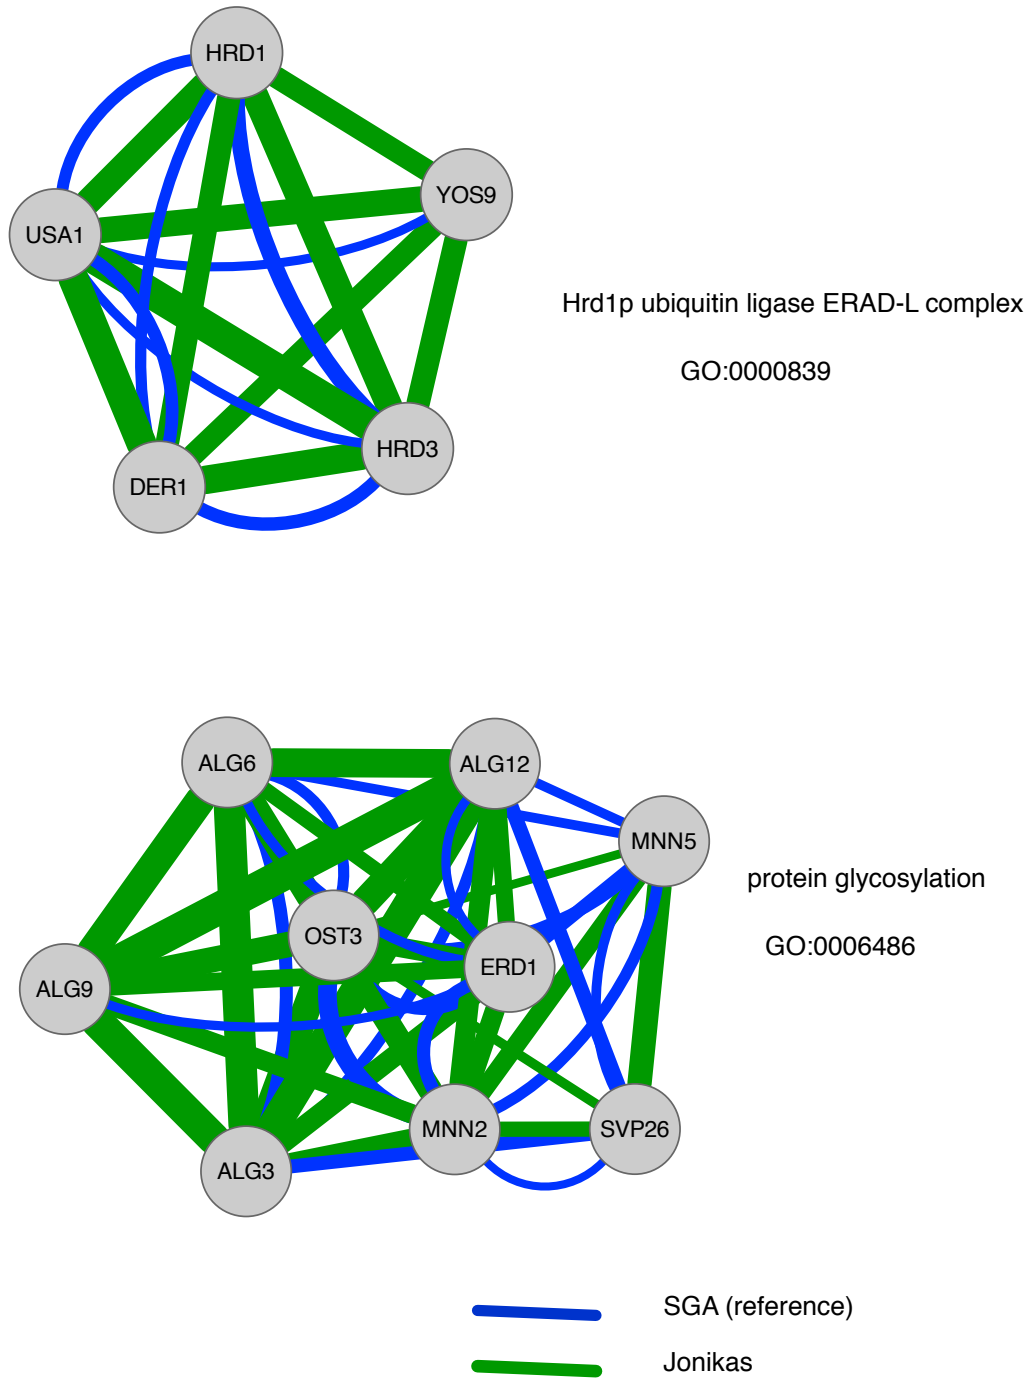

Figure S4. Correlation networks for the SGA and Jonikas data sets, limited to the gene pairs tested in both. The color of the edges indicates the network. The thicker the edge, the higher the correlation value.

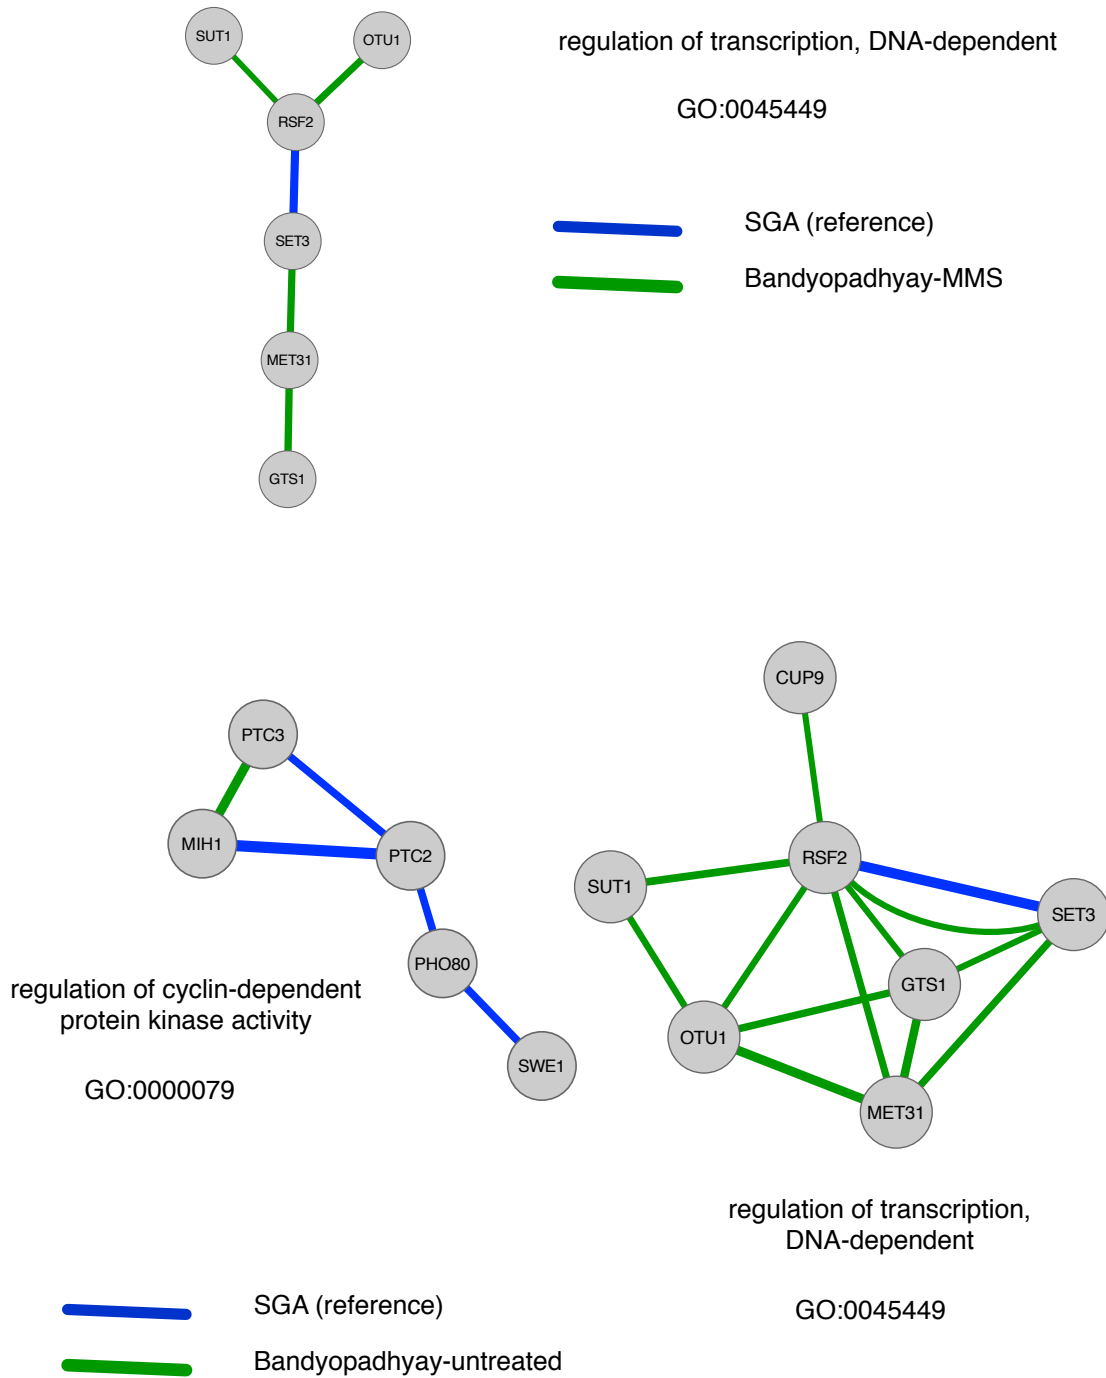

Figure S5. Correlation networks for the SGA and Bandyopadhyay networks, limited to the gene pairs tested in both. The color of the edges indicates the network. The thicker the edge, the higher the correlation value.

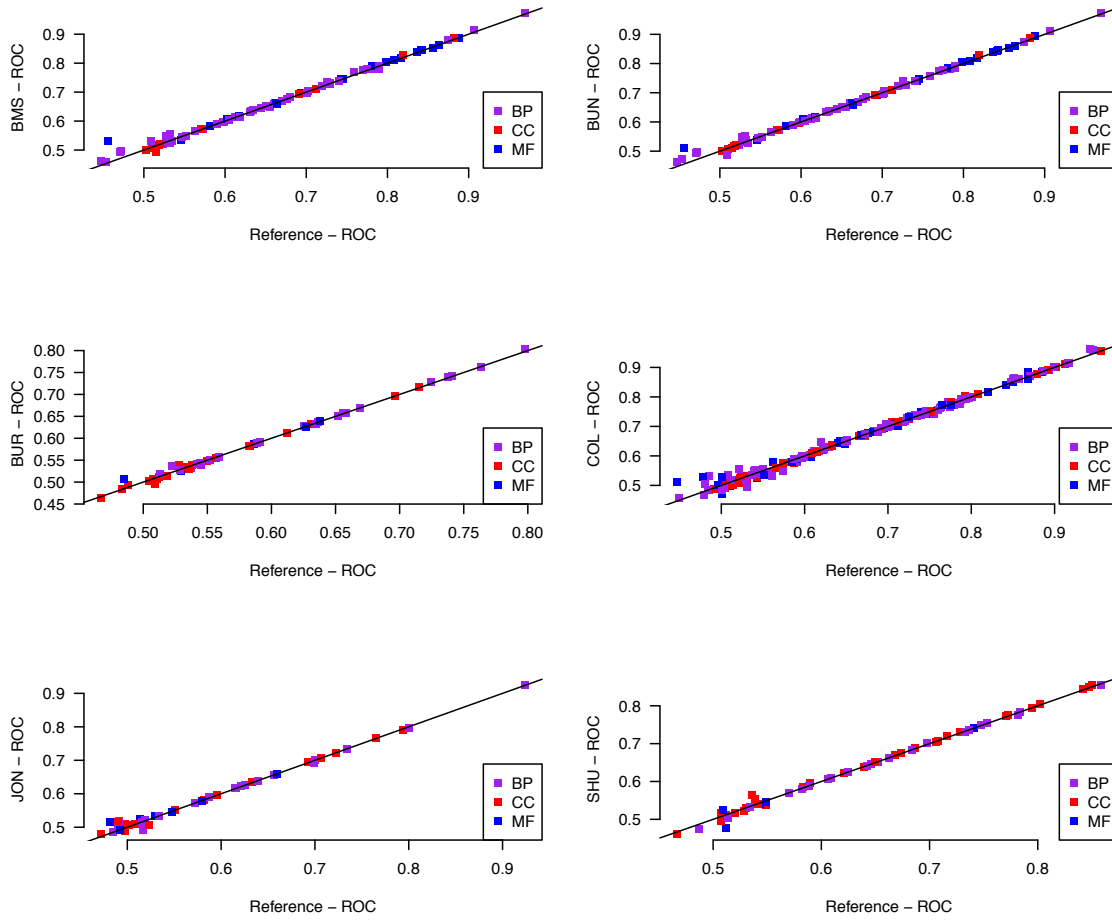

Figure S6. Performance of the combined and reference networks as measured by the area under the ROC curve.

### Triplets of gene pairs tested across reference, control and condition

We study gene function prediction performance on the sets of interactions present in three data sets as described above (triplets). We consider the gene function performance when combining the PHENO/MMS to the SGA reference and when combining the CONTROL to the reference in order to assess the complementarity of the networks. The relative improvement of the combined network C obtained from two individual networks A and B is computed as:

$$I = \frac{S_c - S_{A,B}}{S_{A,B}}$$

where  $S_{A,B}$  is the mean score of the two individual networks A and B.

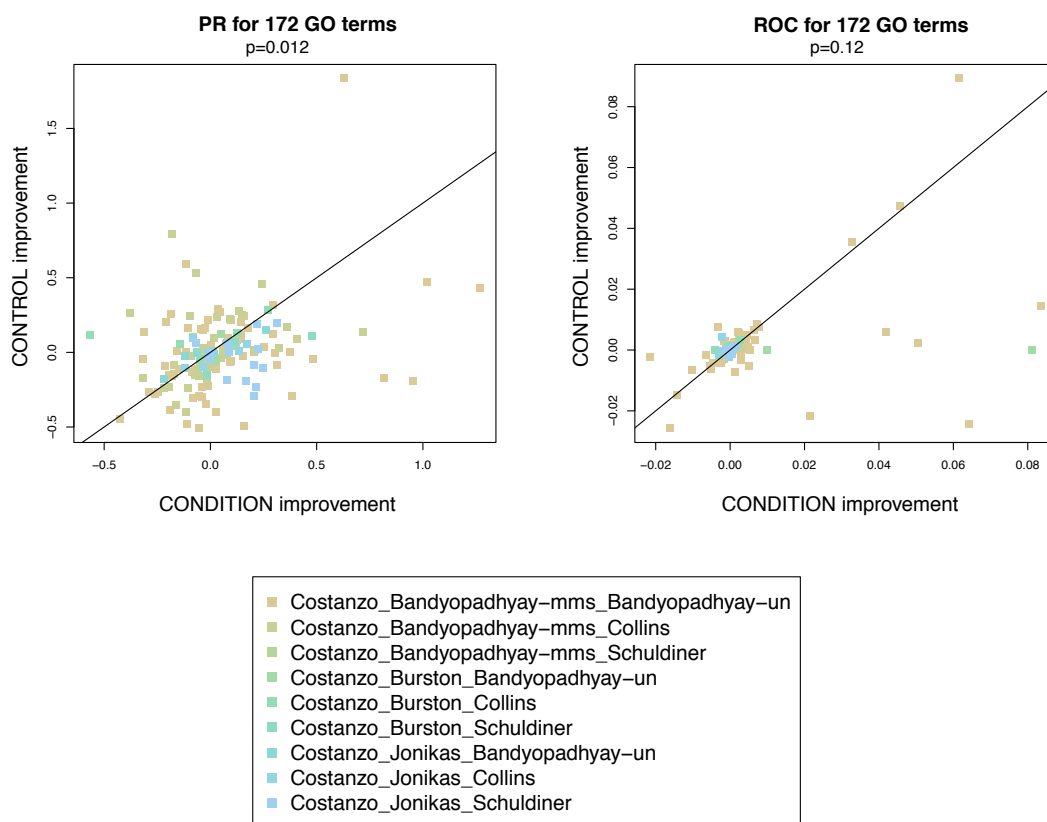

Figure S7. Improvement in the gene function prediction when combining either the PHENO/MMS or the CONTROL correlation network with the SGA reference correlation network, on the exact same set of gene pairs for all three networks.

| GO         |                                          | CONDITION |             | CONTROL |             | Diff  |
|------------|------------------------------------------|-----------|-------------|---------|-------------|-------|
| Id         | Name                                     | Network   | Improvement | Network | Improvement |       |
| GO:0006950 | response to stress                       | BMS       | 0.0641      | BUN     | -0.0242     | 0.088 |
| GO:0004674 | protein serine/threonine kinase activity | Burston   | 0.0812      | BUN     | 9.61E-05    | 0.081 |
| GO:0003682 | chromatin binding                        | BMS       | 0.0836      | BUN     | 0.0144      | 0.069 |
| GO:0006348 | chromatin silencing at telomere          | BMS       | 0.0503      | BUN     | 0.0024      | 0.047 |
| GO:0030437 | ascospore formation                      | BMS       | 0.0215      | BUN     | -0.0215     | 0.043 |
| GO:0034599 | cellular response to oxidative stress    | BMS       | 0.0418      | BUN     | 0.0057      | 0.036 |
| GO:0005886 | plasma membrane                          | BMS       | 0.0050      | BUN     | -0.0052     | 0.010 |
| GO:0006468 | protein phosphorylation                  | Burston   | 0.0099      | BUN     | 0.0001      | 0.009 |

Table S13. List of GO terms with the highest difference in gene function prediction improvement in the CONDITION versus the CONTROL data sets for all interactions tested in the triplet networks (in ROC measurements).

| GO         |                                                                                    | CONDITION |             | CONTROL    |             | Diff  |
|------------|------------------------------------------------------------------------------------|-----------|-------------|------------|-------------|-------|
| Id         | Name                                                                               | Network   | Improvement | Network    | Improvement |       |
| GO:0007165 | signal transduction                                                                | BMS       | 0.9548      | BUN        | -0.1948     | 1.149 |
| GO:0010553 | negative regulation of gene-specific transcription from RNA polymerase II promoter | BMS       | 0.8152      | BUN        | -0.1699     | 0.985 |
| GO:0006950 | response to stress                                                                 | BMS       | 1.2700      | BUN        | 0.4340      | 0.836 |
| GO:0006631 | fatty acid metabolic process                                                       | BMS       | 0.3837      | BUN        | -0.2947     | 0.678 |
| GO:0000082 | G1/S transition of mitotic cell cycle                                              | BMS       | 0.1584      | BUN        | -0.4913     | 0.649 |
| GO:0004407 | histone deacetylase activity                                                       | BMS       | 0.7187      | Collins    | 0.1365      | 0.582 |
| GO:0006350 | transcription                                                                      | BMS       | 1.0194      | BUN        | 0.4732      | 0.546 |
| GO:0003702 | RNA polymerase II transcription factor activity                                    | BMS       | 0.4851      | BUN        | -0.0420     | 0.527 |
| GO:0005788 | endoplasmic reticulum lumen                                                        | Jonikas   | 0.2060      | Schuldiner | -0.2937     | 0.499 |

Table S14. List of GO terms with the highest difference in gene function prediction improvement in the CONDITION versus the CONTROL data sets for all interactions tested in the triplet networks (in PR measurements).

Gene profile correlations

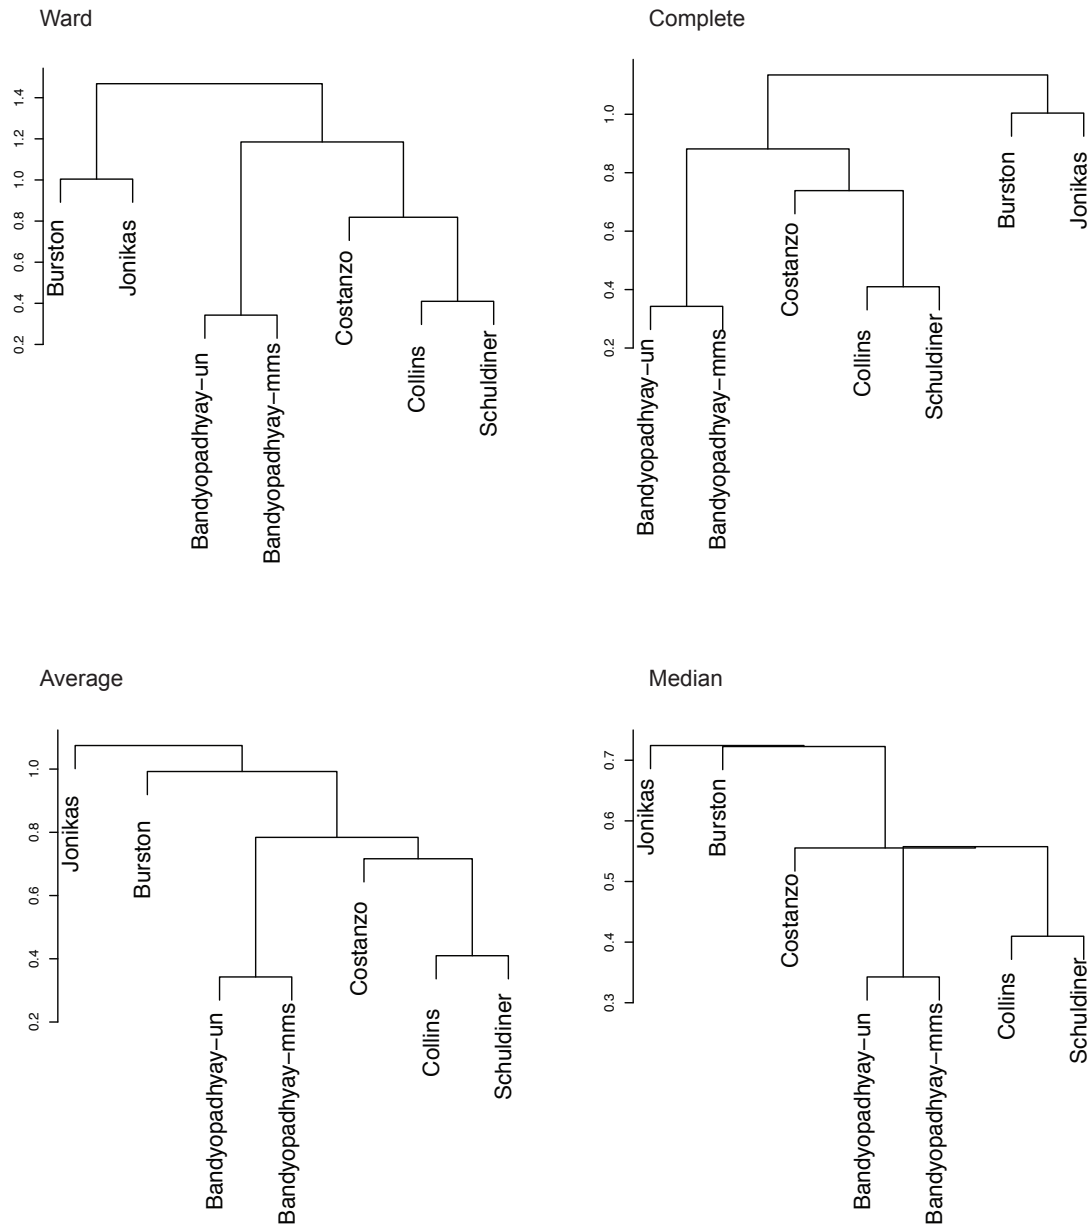

Figure S8. Clustering of the data sets based on the gene profile correlation values. The hierarchical clustering was done using different criteria (Ward, Complete, Average, Median).



## Software

The analyses were performed with R/Bioconductor [8,9], the libraries gplots [10] and ggplots2 [11], as well as the annotation packages GO.db [12] and org.Sc.sgd.db [13].

## References

1. Costanzo M, Baryshnikova A, Bellay J, Kim Y, Spear ED, et al. (2010) The genetic landscape of a cell. *Science* 327: 425-431.
2. Collins SR, Miller KM, Maas NL, Roguev A, Fillingham J, et al. (2007) Functional dissection of protein complexes involved in yeast chromosome biology using a genetic interaction map. *Nature* 446: 806-810.
3. Schuldiner M, Collins SR, Thompson NJ, Denic V, Bhamidipati A, et al. (2005) Exploration of the function and organization of the yeast early secretory pathway through an epistatic miniarray profile. *Cell* 123: 507-519.
4. Bandyopadhyay S, Mehta M, Kuo D, Sung M-K, Chuang R, et al. (2010) Rewiring of genetic networks in response to DNA damage. *Science* 330: 1385-1389.
5. Burston HE, Maldonado-Báez L, Davey M, Montpetit B, Schluter C, et al. (2009) Regulators of yeast endocytosis identified by systematic quantitative analysis. *J Cell Biol* 185: 1097-1110.
6. Jonikas MC, Collins SR, Denic V, Oh E, Quan EM, et al. (2009) Comprehensive characterization of genes required for protein folding in the endoplasmic reticulum. *Science* 323: 1693-1697.
7. Chiang T, Scholtens D, Sarkar D, Gentleman R, Huber W (2007) Coverage and error models of protein-protein interaction data by directed graph analysis. *Genome Biol* 8: R186.
8. R Development Core Team (2011). R: A language and environment for statistical computing. R Foundation for Statistical Computing, Vienna, Austria. ISBN 3-900051-07-0, URL <http://www.R-project.org/>.
9. Gentleman RC, Carey VJ, Bates DM, Bolstad B, Dettling M, et al. (2004) Bioconductor: open software development for computational biology and bioinformatics. *Genome biology* 5: R80.
10. Gregory R. Warnes. Includes R source code and/or documentation contributed by: Ben Bolker (in alphabetical order), Lodewijk Bonebakker, Robert Gentleman, Wolfgang Huber Andy Liaw, Thomas Lumley, Martin Maechler, Arni Magnusson, Steffen Moeller, Marc Schwartz and Bill Venables (2011). gplots: Various R programming tools for plotting data. R package version 2.10.1. <http://CRAN.R-project.org/package=gplots>.
11. H. Wickham. ggplot2: elegant graphics for data analysis. Springer New York, 2009.
12. Marc Carlson, Seth Falcon, Herve Pages and Nianhua Li (). GO.db: A set of annotation maps describing the entire Gene Ontology. R package version 2.5.0.
13. Marc Carlson, Seth Falcon, Herve Pages and Nianhua Li (). org.Sc.sgd.db: Genome wide annotation for Yeast. R package version 2.5.0.
